# Supplementary material for: Microfluidic approach for rapid multicomponent interfacial tensiometry
Source: Royal Society of Chemistry journal article supplement (doi:10.1039/b511976f), 2006-01-01
Supplement: b511976f.doc [file b511976f.doc]

### Supplementary Material (ESI) for Lab on a Chip

### This journal is © The Royal Society of Chemistry 2006

### Supporting information

# Microfluidic approach for rapid interfacial tensiometry

João T. Cabral and Steven D. Hudson

Polymers Division, National Institute of Standards and Technology

Gaithersburg, MD 20899

**Figure S1.** Finite element simulation of Navier-Stokes flow (using FEMlab10) used to guide the design of an optimized junction to assist the plug-to-drop transition. Arranging the focusing channels at a small angle relative to the incoming narrow channel, provides a central streamline with near-constant velocity (color-coded), which prevents drop collision (and possible coalescence) and breakup due to abrupt extension. A 30° angle was implemented experimentally.

**Figure S2.** Hybrid rapid prototyping involving a combination of SU8 and 3D FPP photolithography [24], yielding various lateral and vertical lengthscales. Small drops are formed at a T-junction fabricated with SU8 (50 m square cross-section) and interrogated in a much wider and taller channel (300 and 700 m wide and 700 m tall). The fabrication steps involved are: master fabrication (UV exposure and development), PDMS replication, coring of the top slab (with larger, visible features), oxygen plasma exposure, alignment in register (with patterns facing each other) and irreversible sealing, and finally input/output connection. Aligning features are introduced on both halves to facilitate the process. An optional heat treatment at 120 ºC overnight renders the channel walls hydrophobic. The bottom PDMS slab should be approximately 1 mm thick for optimal microscopy imaging.
